# Supplementary material for: Response surface methodology directed adsorption of chlorate and chlorite onto MIEX resin and study of chemical properties
Source: Royal Society of Chemistry journal article supplement (doi:10.1039/c9ew01003c), 2020-01-01
Supplement: c9ew01003c1.pdf [file c9ew01003c1.pdf]

## Response surface methodology directed adsorption of chlorate and chlorite onto MIEX resin and chemical properties study

Yiqiong Yang <sup>a</sup>, Zenghui Zheng <sup>a</sup>, Dongfeng Zhang <sup>a</sup>, Xiaodong Zhang <sup>a\*</sup>

<sup>a</sup> School of Environment and Architecture, University of Shanghai for Science and Technology, Shanghai 200093, China

**Table S1** Level of various independent variables at coded values of response surface methodology experimental design.

| Symbol | Independent variables        | Coded levels |      |    |
|--------|------------------------------|--------------|------|----|
|        |                              | -1           | 0    | 1  |
| A      | MIEX resin dosage (mL/L)     | 2            | 6    | 10 |
| B      | Reaction time (min)          | 0            | 30   | 60 |
| C      | Initial concentration (mg/L) | 0.5          | 2.25 | 4  |

\* To whom correspondence should be addressed. Tel. +86 15921267160, Fax. +86 021 55275979

E-mail address: [fatzhxd@126.com](mailto:fatzhxd@126.com) (X.D. Zhang)
